# Supplementary material for: Amount of Information Needed for Model Choice in Approximate Bayesian Computation
Source: PLOS journal article supplement (doi:10.1371/journal.pone.0099581), 2014-06-24

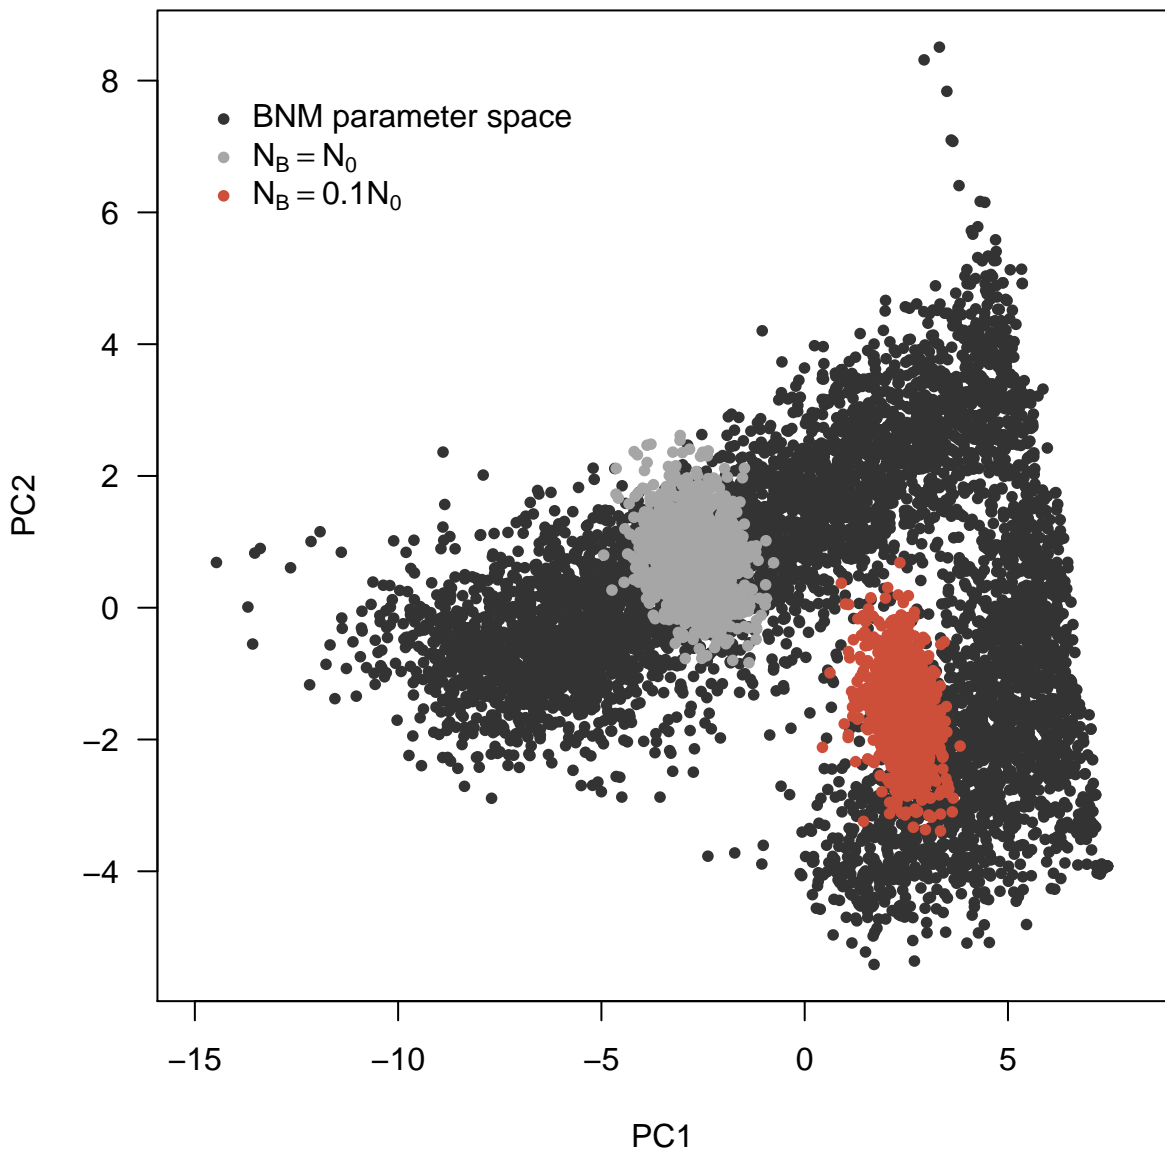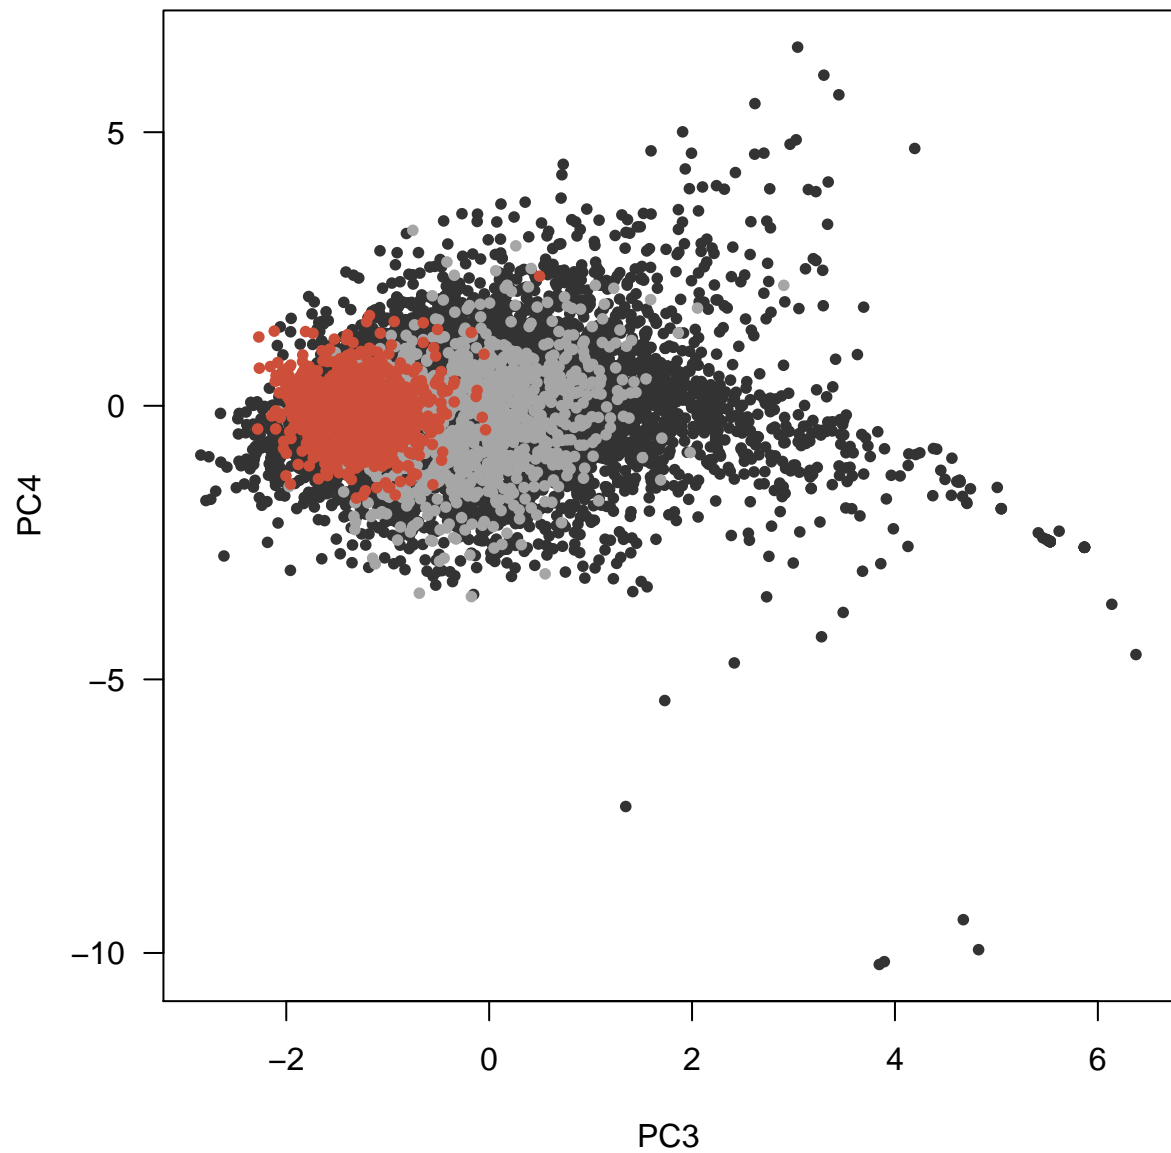

Supplement: S1 (10.1371/journal.pone.0099581.s001) [file journal.pone.0099581.s001]
